# Supplementary material for: Antimicrobial Films Based on Nanocomposites of Chitosan/Poly(vinyl alcohol)/Graphene Oxide for Biomedical Applications
Source: PubMed Central journal article supplement (PMC6468879; doi:10.3390/biom9030109), 2019-03-18
Supplement: biomolecules-09-00109-s001.pdf [file biomolecules-09-00109-s001.pdf]

# Supplementary Materials: Antimicrobial Films Based on Nanocomposites of Chitosan/Poly(vinyl alcohol)/Graphene Oxide for Biomedical Applications

Sebastián Ruiz <sup>1</sup>, Julián Andrés Tamayo <sup>1</sup>, Johannes Delgado Ospina<sup>2</sup>, Diana Paola Navia Porras<sup>2</sup>, Mayra Eliana Valencia Zapata <sup>1</sup>, José Herminul Mina Hernandez <sup>1</sup>, Carlos Humberto Valencia <sup>3</sup>, Fabio Zuluaga <sup>4</sup> and Carlos David Grande Tovar <sup>5,\*</sup>

<sup>1</sup> Escuela de Ingeniería de Materiales, Facultad de Ingeniería, Universidad del Valle, Calle 13 No. 100-00, Santiago de Cali 760032, Colombia; sebastian.ruiz.londono@correounivalle.edu.co (S.L.); julian.tamayo@correounivalle.edu.co (J.T.); valencia.mayra@correounivalle.edu.co (M.V.); jose.mina@correounivalle.edu.co (J.M.)

<sup>2</sup> Grupo de Investigación Biotecnología, Facultad de Ingeniería, Universidad de San Buenaventura Cali, Carrera 122 # 6-65, 76001 Cali, Colombia; jdelgado1@usbcali.edu.co (J.D.); dpnavia@usbcali.edu.co (D.N.)

<sup>3</sup> Escuela de Odontología, Grupo Biomateriales Dentales, Universidad del Valle, Calle 13 No. 100-00, 76001 Cali, Colombia; carlos.humberto.valencia@correounivalle.edu.co

<sup>4</sup> Laboratorio SIMERQO, Departamento de Química, Universidad del Valle, Calle 13 No. 100-00, 76001 Cali, Colombia; hector.zuluaga@correounivalle.edu.co

<sup>5</sup> Programa de Química, Facultad de Ciencias, Universidad del Atlántico, Carrera 30 No. 8-49, Puerto Colombia 081008, Colombia

\* Correspondence: carlosgrande@mail.uniatlantico.edu.co; Tel.: +57-5-385-22

**Table S1.** Energy dispersive X-ray spectroscopy (EDS) results of the Formulation F2.

| <b>Spectrum</b> | <b>In stats.</b> | <b>C<br/>(% atom)</b> | <b>O<br/>(% atom)</b> | <b>Na<br/>(% atom)</b> | <b>Mg<br/>(% atom)</b> | <b>P<br/>(% atom)</b> | <b>Cl<br/>(% atom)</b> | <b>Ca<br/>(% atom)</b> | <b>Total</b> |
|-----------------|------------------|-----------------------|-----------------------|------------------------|------------------------|-----------------------|------------------------|------------------------|--------------|
| 1               | Yes              | 6.32                  | 43.49                 | 2.55                   | 0.74                   | 16.32                 | 0.94                   | 29.65                  | 100.00       |
| 2               | Yes              | 15.70                 | 41.21                 | 4.74                   | -                      | 9.46                  | 10.53                  | 18.36                  | 100.00       |
| 3               | Yes              | 10.62                 | 39.46                 | 5.53                   | -                      | 13.89                 | 3.05                   | 27.44                  | 100.00       |
| 4               | Yes              | 8.19                  | 40.11                 | 1.72                   | 0.67                   | 15.66                 | 2.94                   | 30.71                  | 100.00       |
| 5               | Yes              | 7.14                  | 35.69                 | 1.29                   | 0.64                   | 16.41                 | 2.12                   | 36.70                  | 100.00       |
| 6               | Yes              | 33.38                 | 11.64                 | 13.02                  | -                      | -                     | 41.19                  | 0.77                   | 100.00       |
| 7               | Yes              | -                     | 45.29                 | 10.08                  | -                      | 11.07                 | 11.40                  | 22.16                  | 100.00       |
